# Supplementary material
Source: PubMed Central journal article supplement (PMC4635459)
Supplement: mic-161-10-1999-s001.pdf [file mic-161-10-1999-s001.pdf]

1 Supplementary figure S1, S2, S3, S4 and S5

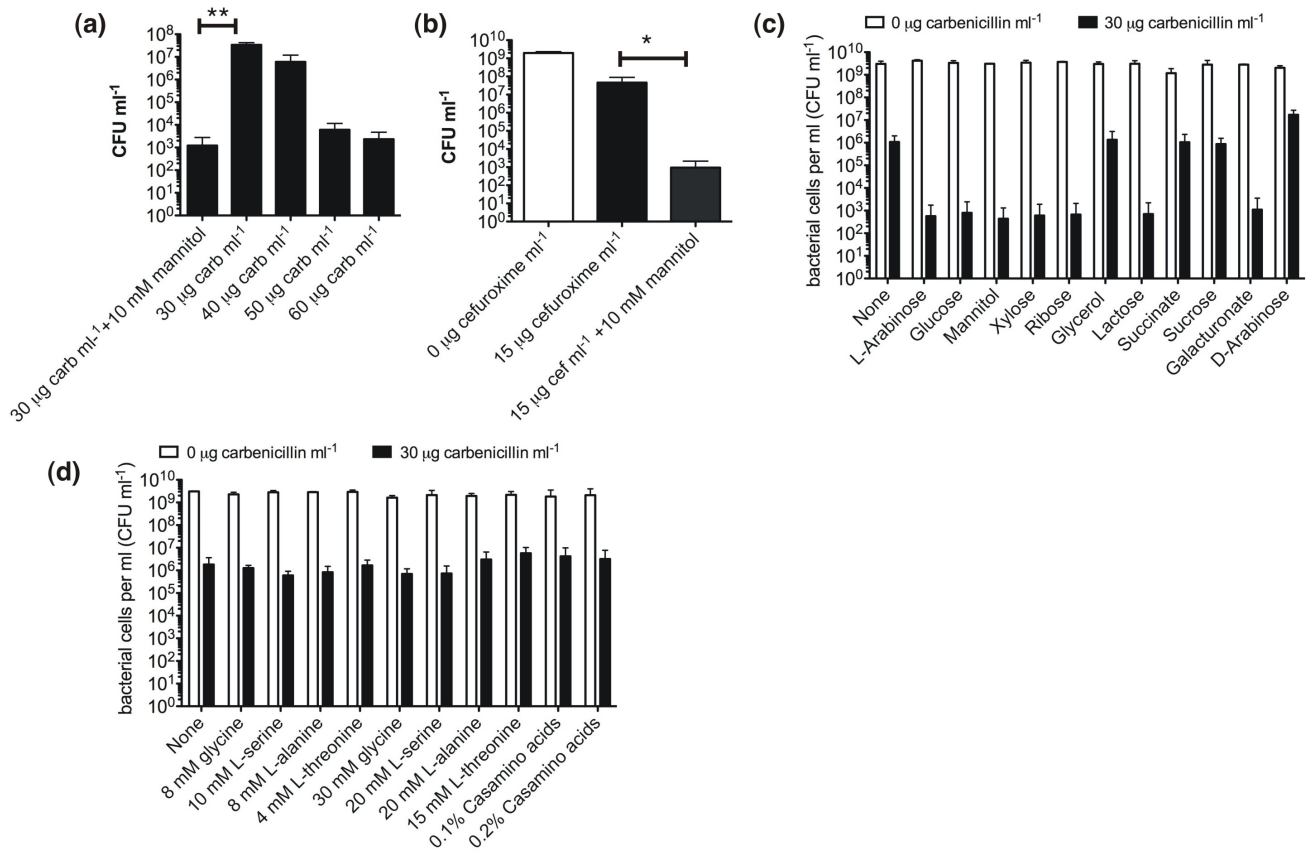

2

3 **Figure S1.** Survival of *E. coli* MG1655 after 18 hours of treatment. **(a)** Carbenicillin titration.

4 Addition of 10 mM D-mannitol to 30 μg carbenicillin ml<sup>-1</sup> equals the effect of 60 μg carbenicillin

5 ml<sup>-1</sup> alone n=3, p<0.0023 (\*\*). **(b)** Cefuroxime, another β-lactam antibiotic, is also potentiated

6 when given in combination with 10 mM D-mannitol, n=4, p<0.047 (\*). **(c)** Effect of different

7 metabolites on carbenicillin susceptibility, (L-arabinose, glucose and mannitol are repeated from

8 Figure 1) n ≥3 (\*) p<0.0213. **(d)** Effect of single amino acids or casamino acids on carbenicillin

9 susceptibility, n=3.

10

11

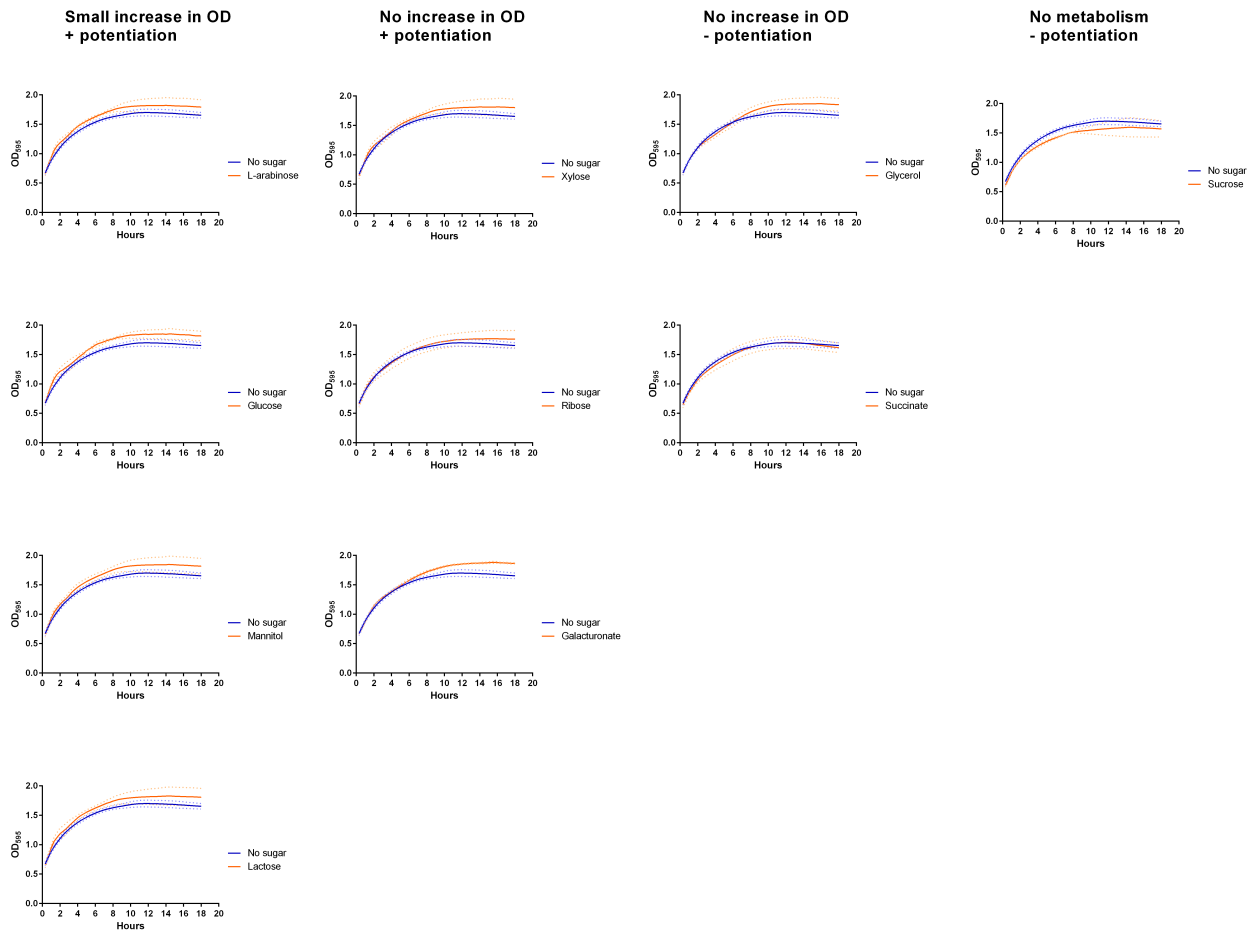

1

2 **Figure S2.** OD(595nm) measurement of *E. coli* MG1655 during 18 hours of growth with (red lines)  
 3 of without (blue lines) supplementation with different sugars. Any minor differences in growth rate  
 4 as judged by the slope of the growth curve during the first 4-6 hours did not correlate with the  
 5 ability of the sugar to potentiate beta-lactam bactericidal action.

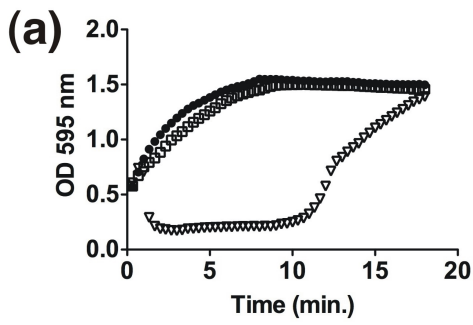

• untreated  
 □ 20 µg D-cycloserine ml<sup>-1</sup> ▽ 20 D-CS + 10 mM glu

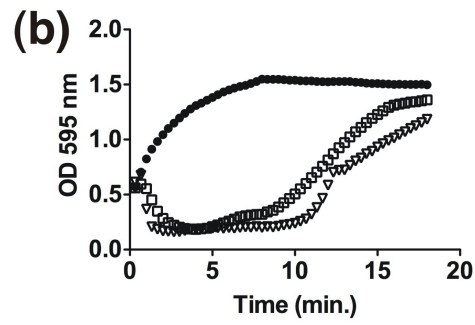

• untreated  
 □ 25 µg D-cycloserine ml<sup>-1</sup> ▽ 25 D-CS + 10 mM glu

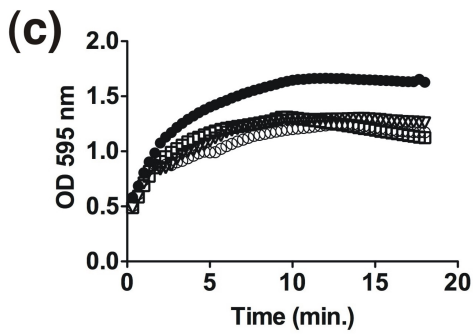

• untreated □ 100 µg mecillinam ml<sup>-1</sup>  
 ▽ 100 mec + 12 mM ara ○ 100 mec + 10 mM glu

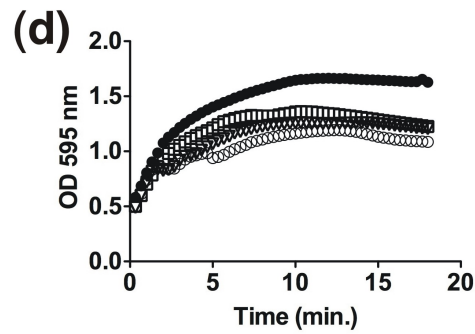

• untreated □ 200 µg mecillinam ml<sup>-1</sup>  
 ▽ 200 mec + 12 mM ara ○ 200 mec + 10 mM glu

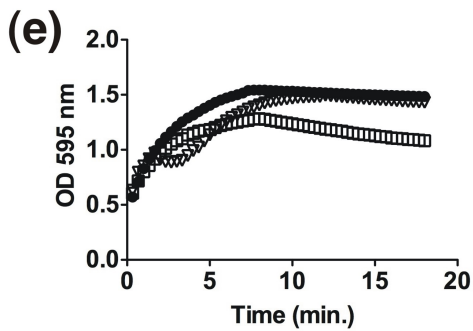

• untreated  
 □ 50 µg cephalalexin ml<sup>-1</sup> ▽ 50 ceph + 10 mM glu

1

2 **Figure S3.** OD(595nm) measurement of *E. coli* MG1655 during 18 hours of growth with D-  
 3 cycloserine (D-CS) **(a-b)**, mecillinam (mec) **(c-d)**, or cephalalexin (ceph) **(e)** in absence (open  
 4 squares) or presence of 12mM L-arabinose (open triangles) or 10 mM glucose (open circles).

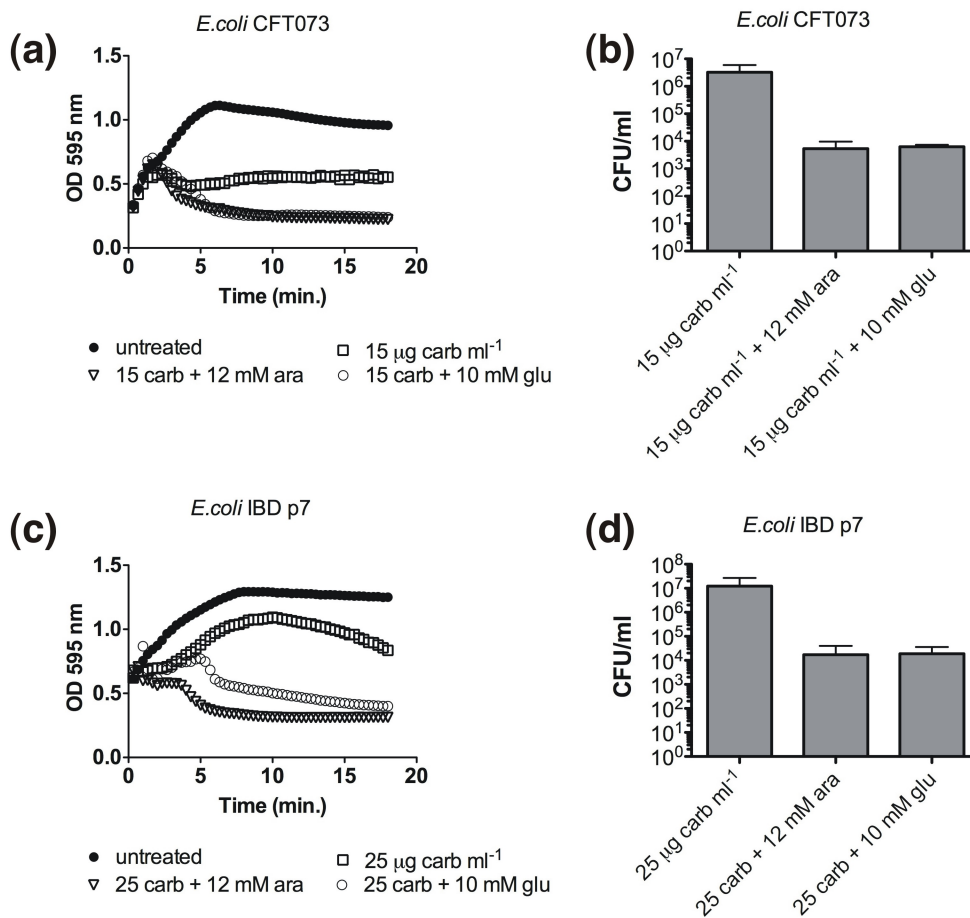

1

2 **Figure S4.** Impact of sugar metabolites on *E. coli* CFT073 and *E. coli* IBD479 antibiotic sensitivity.  
 3 **(a)** Optical density of CFT073 cultures during 18 hours of treatment with 15  $\mu\text{g carbicillin ml}^{-1}$   
 4 (carb) alone (open squares) or in combination with sugars (arabinose, open triangles; glucose, open  
 5 circles). **(b)** CFT073 was treated with 15  $\mu\text{g carbicillin ml}^{-1}$  alone or in combination with 12 mM  
 6 L-arabinose or 10 mM D-glucose. Survival was monitored after 18 hours of treatment.  $n=3$  (15  $\mu\text{g}$   
 7 carb  $\text{ml}^{-1}$  versus 15  $\mu\text{g carb ml}^{-1}$  + 12mM ara,  $p < 0.11$ ). **(c)** Optical density of IBD479 cultures  
 8 during 18 hours of treatment with 25  $\mu\text{g carbicillin ml}^{-1}$  (carb) alone (open squares) or in  
 9 combination with sugars (arabinose, open triangles; glucose, open circles). **(d)** IBD479 was treated  
 10 with 25  $\mu\text{g carbicillin ml}^{-1}$  alone or in combination with 12 mM L-arabinose or 10 mM D-  
 11 glucose. Survival was monitored after 18 hours of treatment,  $n=3$ .

**(a)** 30  $\mu$ g carbenicillin ml-1 - 1h

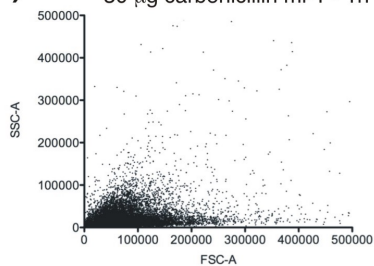

**(f)** 30  $\mu$ g carb ml-1 + 12mM L-ara - 1h

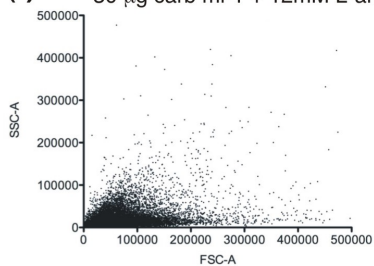

**(b)** 30  $\mu$ g carbenicillin ml-1 - 2h

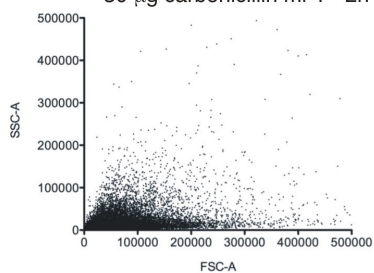

**(g)** 30  $\mu$ g carb ml-1 + 12mM L-ara - 2h

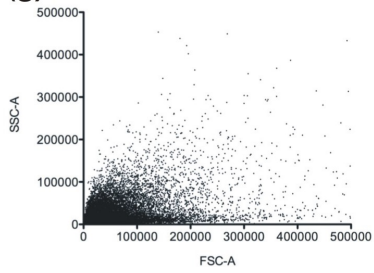

**(c)** 30  $\mu$ g carbenicillin ml-1 - 4h

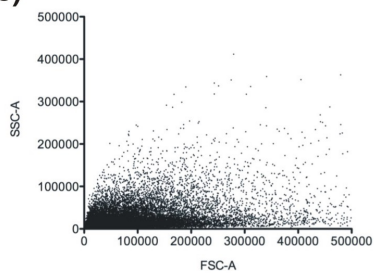

**(h)** 30  $\mu$ g carb ml-1 + 12mM L-ara - 4h

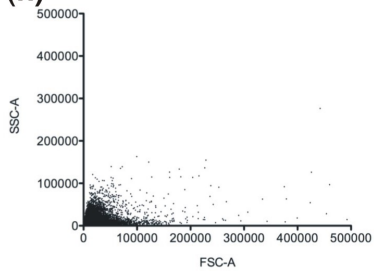

**(d)** 30  $\mu$ g carbenicillin ml-1 - 6h

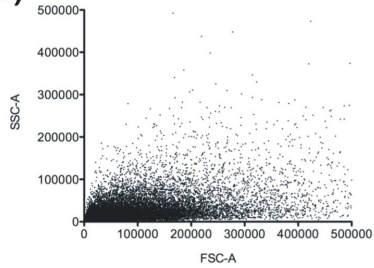

**(i)** 30  $\mu$ g carb ml-1 + 12mM L-ara - 6h

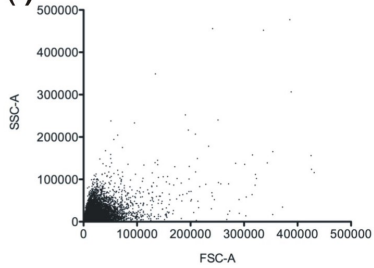

**(e)** 30  $\mu$ g carbenicillin ml-1 - 10h

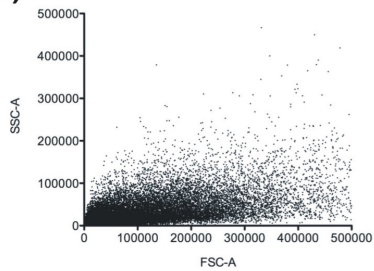

**(j)** 30  $\mu$ g carb ml-1 + 12mM L-ara - 10h

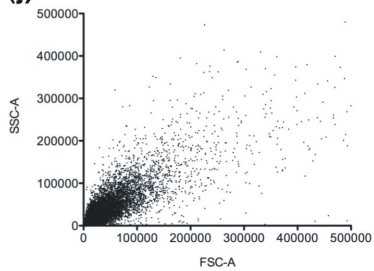

1 **Figure S5.** Time-course flow cytometry following the change in bacterial cell morphology during  
2 treatment. *E. coli* MG1655 was treated with 30  $\mu\text{g}$  carbenicillin  $\text{ml}^{-1}$  alone (left column, **a-e**) or in  
3 combination with 12 mM L-arabinose (right column, **f-j**) and analysed by flow cytometry after 0, 2,  
4 4, 6, and 10 hours of treatment.

5
